# Supplementary material for: Controls on surface aerosol number concentrations and aerosol-limited cloud regimes over the central Greenland Ice Sheet
Source: Copernicus journal article supplement (doi:10.5194/acp-2021-491), 2021-06-29

## Anomalously low $N_{20}$ events:

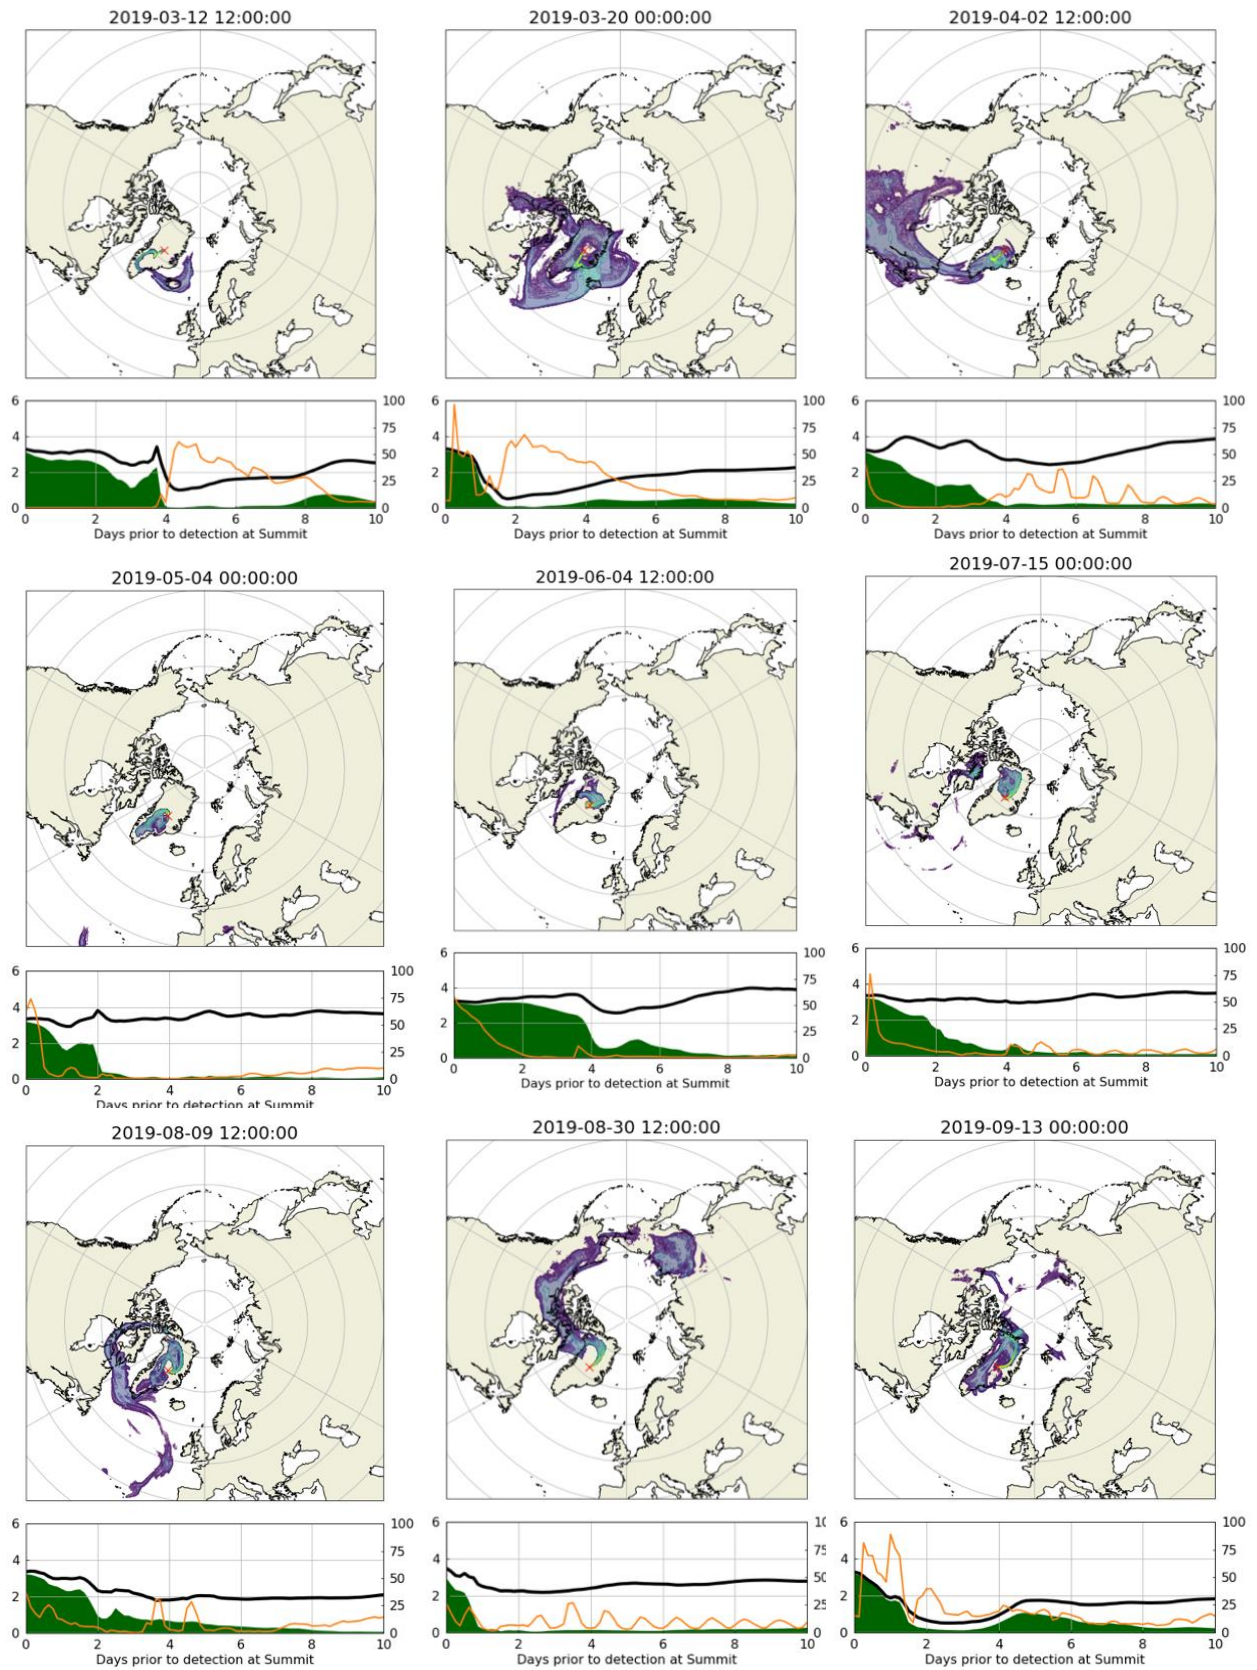

## Anomalously low $N_{20}$ events cont.:

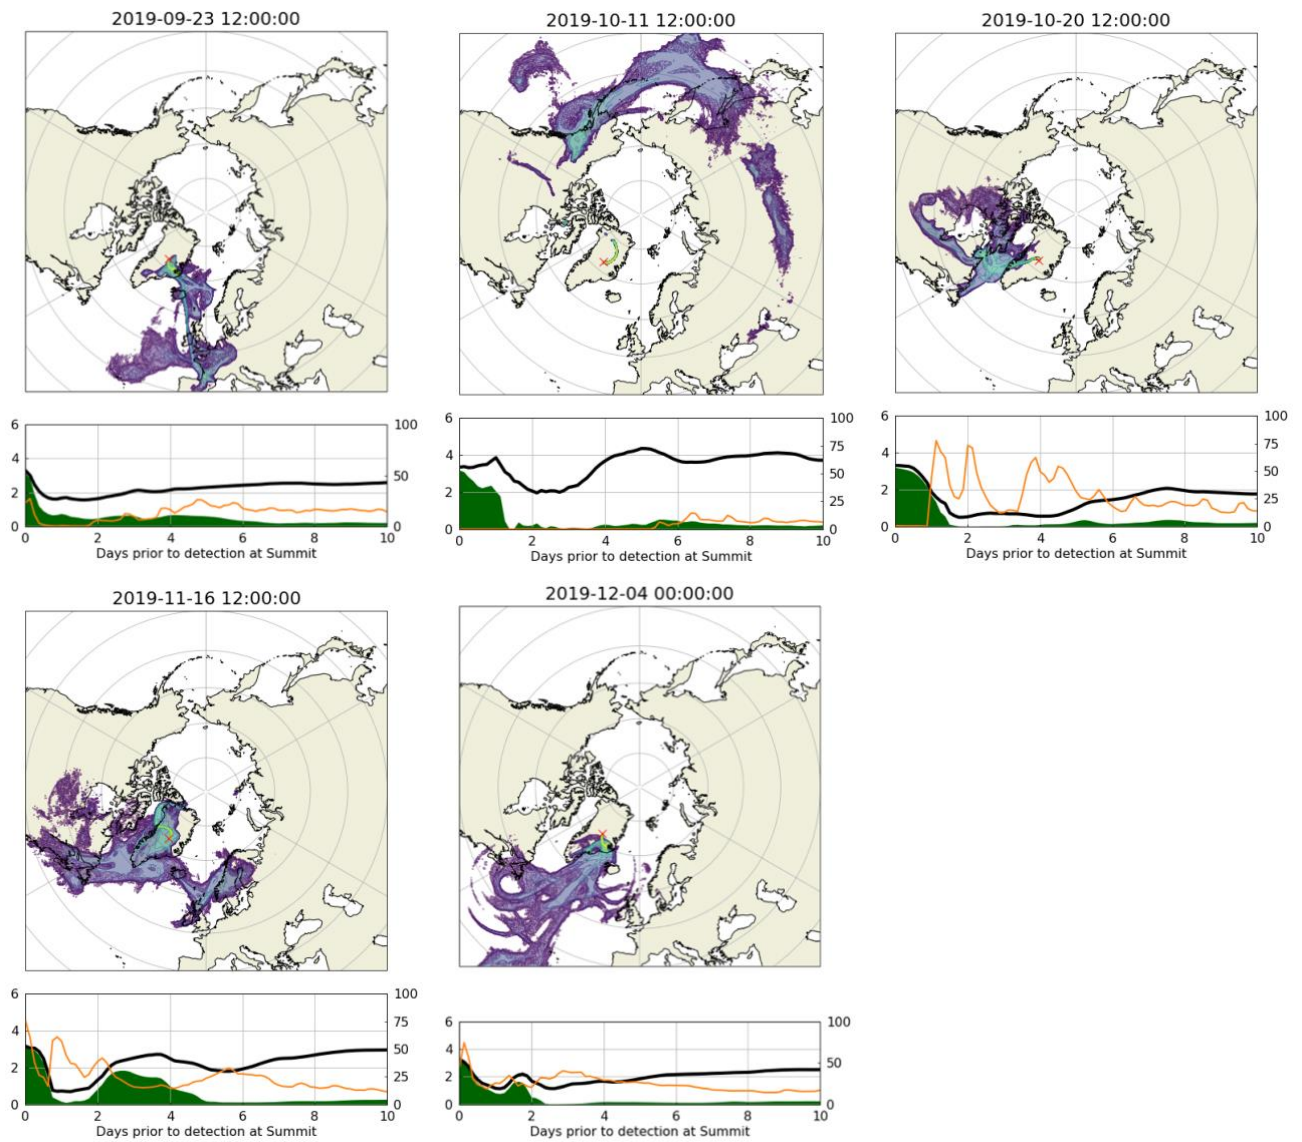



## Anomalously high N<sub>20</sub> events:

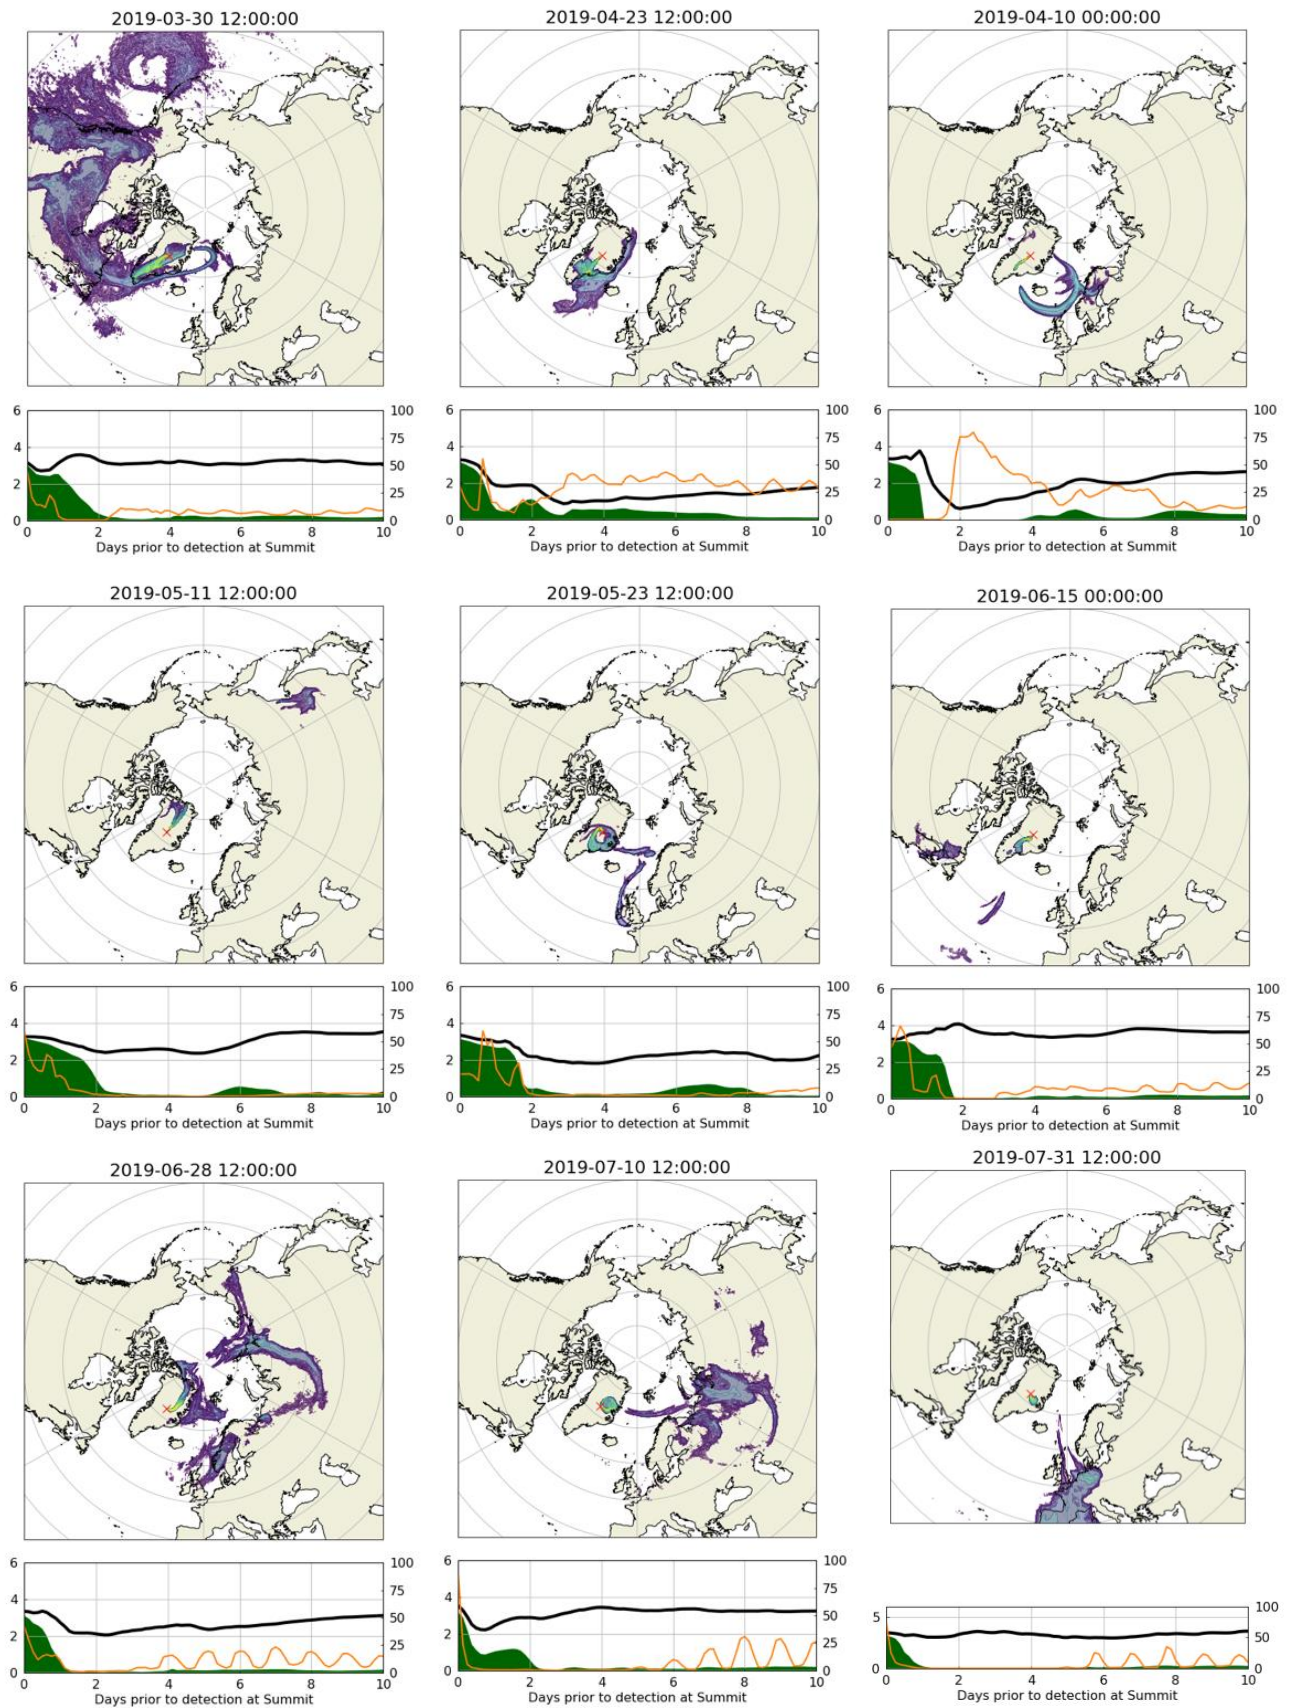

## Anomalously high N<sub>20</sub> events cont.:

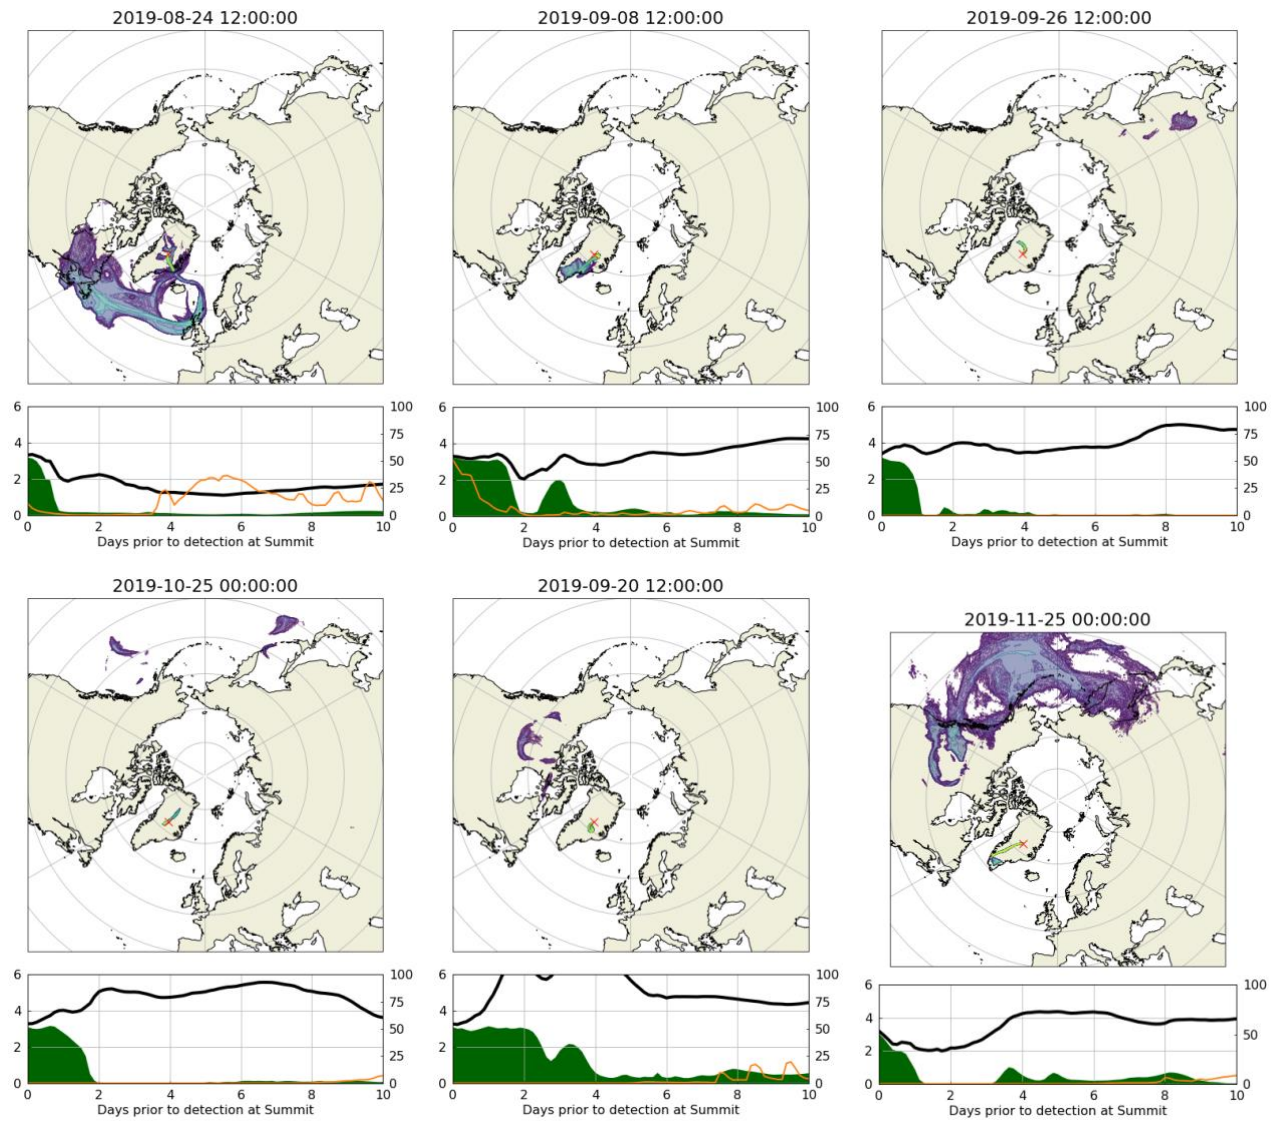

Supplement: Supplementary file [file acp-2021-491-AC1-supplement.zip]
